# Supplementary material
Source: publisher site journal article supplement (https://www.spandidos-publications.com/4161/downloadSupplementary)

Figure S1. Specific mechanism diagram of the article. LPS-induced ATDC5 cells upregulated the expression of KLF4, whereas KLF4 downregulated FGF21 to promote the activation of SIRT1/NF- $\kappa$ B/p53 signaling pathway, which ultimately led to inhibited cell viability, enhanced cell apoptosis and induction of an optimistic inflammatory response in cells. LPS, lipopolysaccharide; KLF4, Krüppel-like factor 4; FGF21, fibroblast growth factor 21; SIRT1, sirtuin 1.

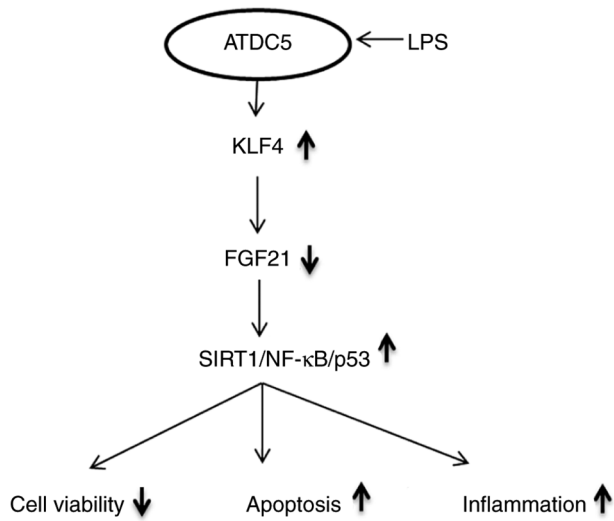

Supplement: Supplementary file 1 [file downloadSupplementary]
